# Supplementary material
Source: ML conference proceedings conference paper supplement (https://aclanthology.org/2022.acl-short.51)

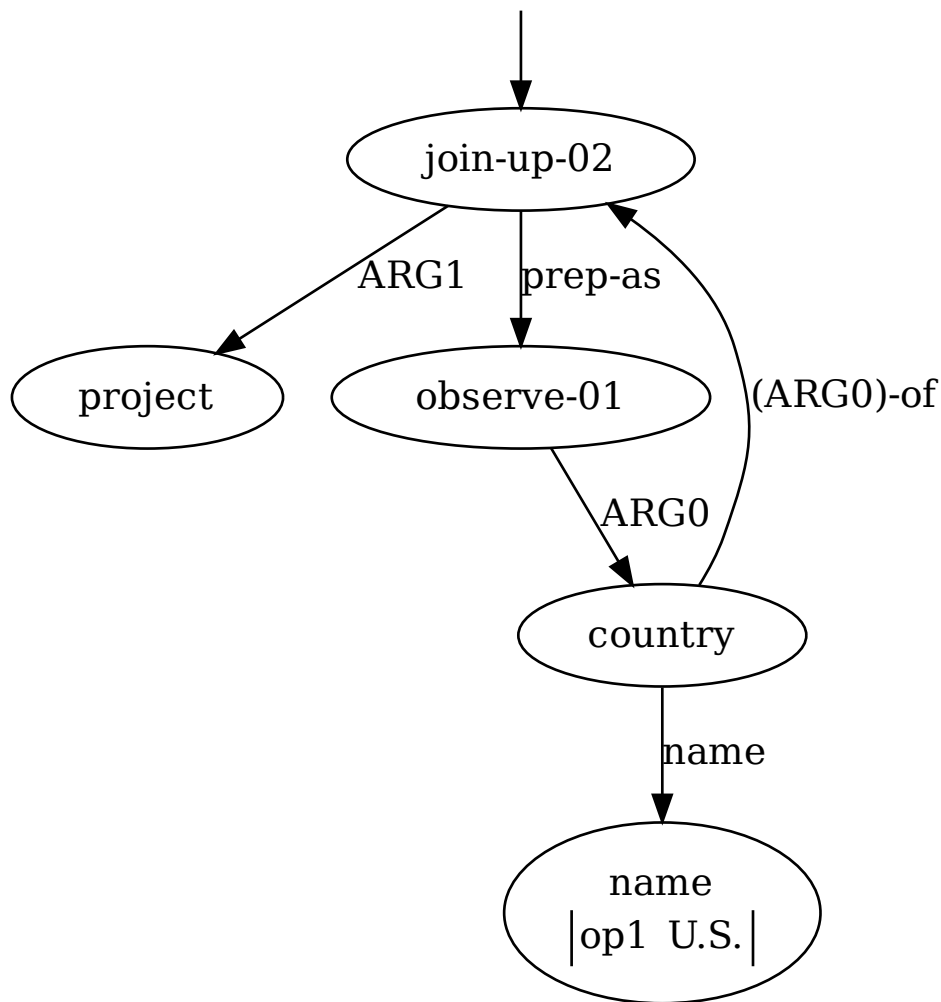

Supplement: software [file 2022.acl-short.51.software.zip]

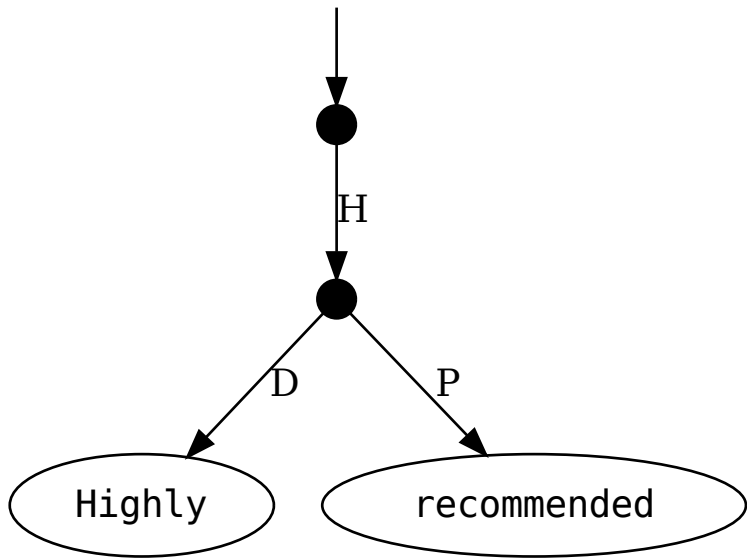

Supplement: software [file 2022.acl-short.51.software.zip]

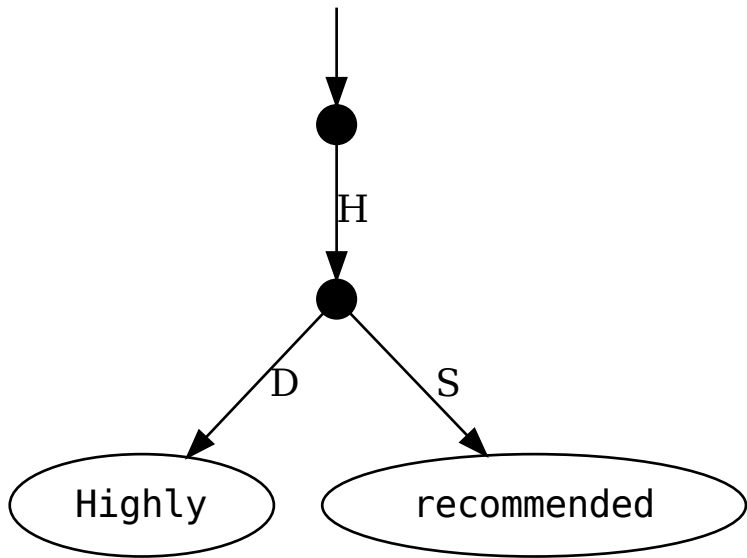

Supplement: software [file 2022.acl-short.51.software.zip]

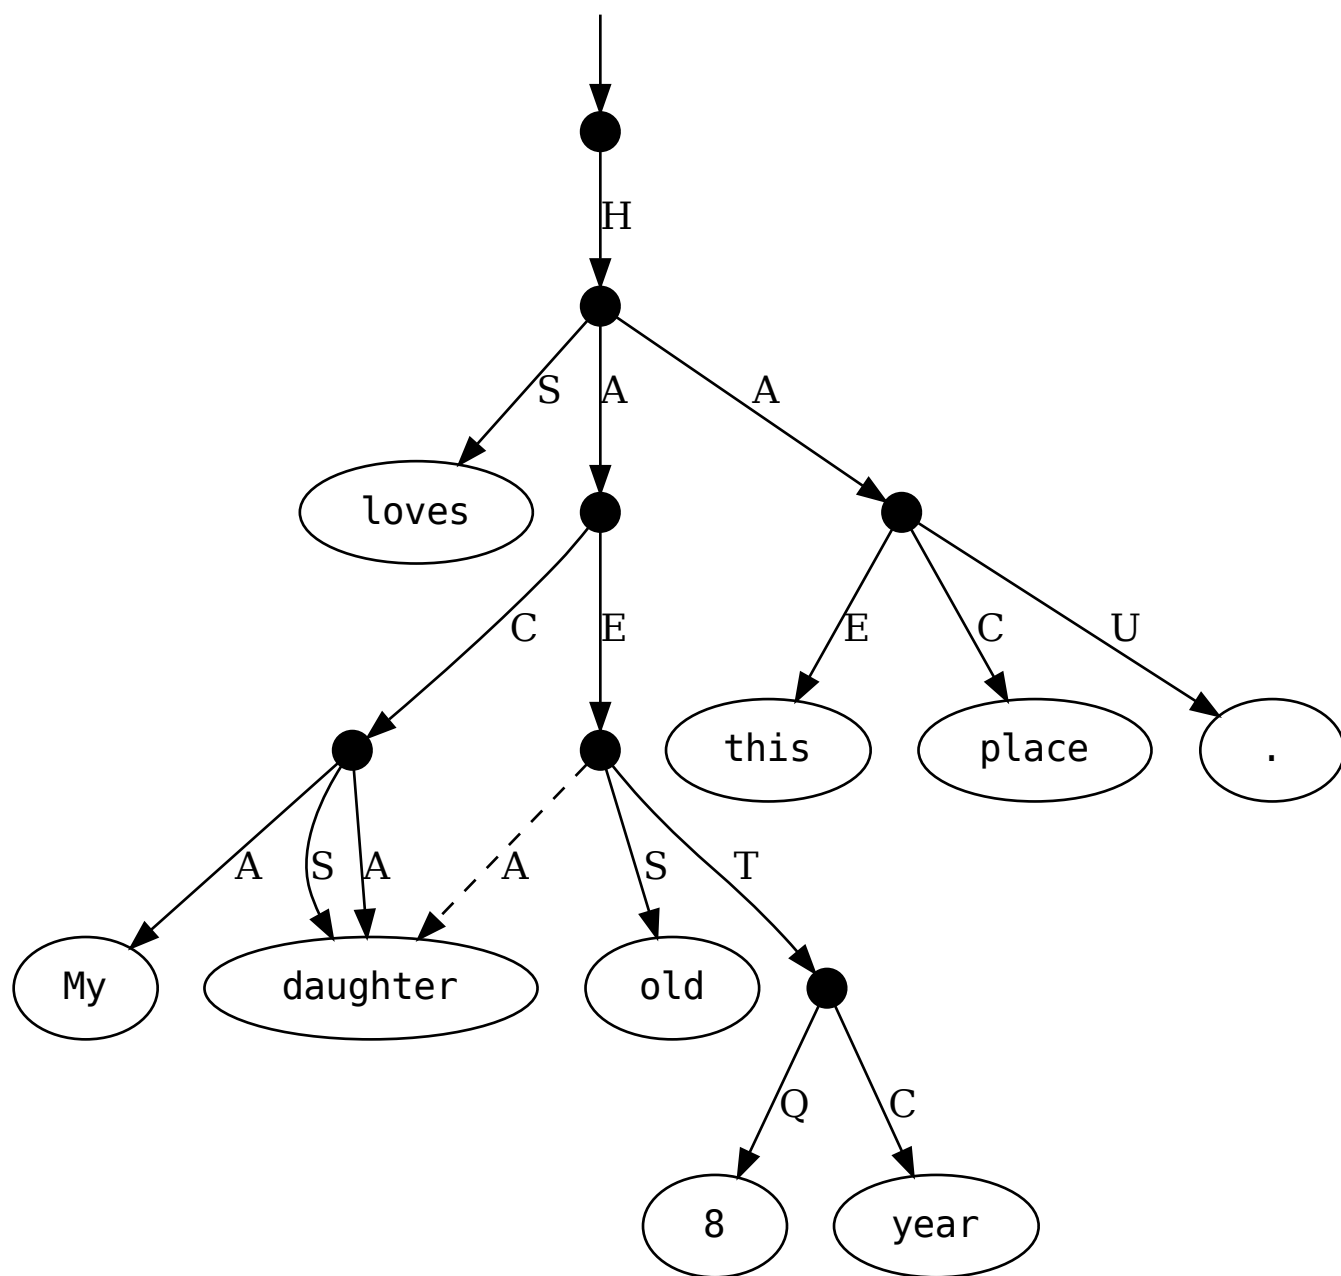

Supplement: software [file 2022.acl-short.51.software.zip]

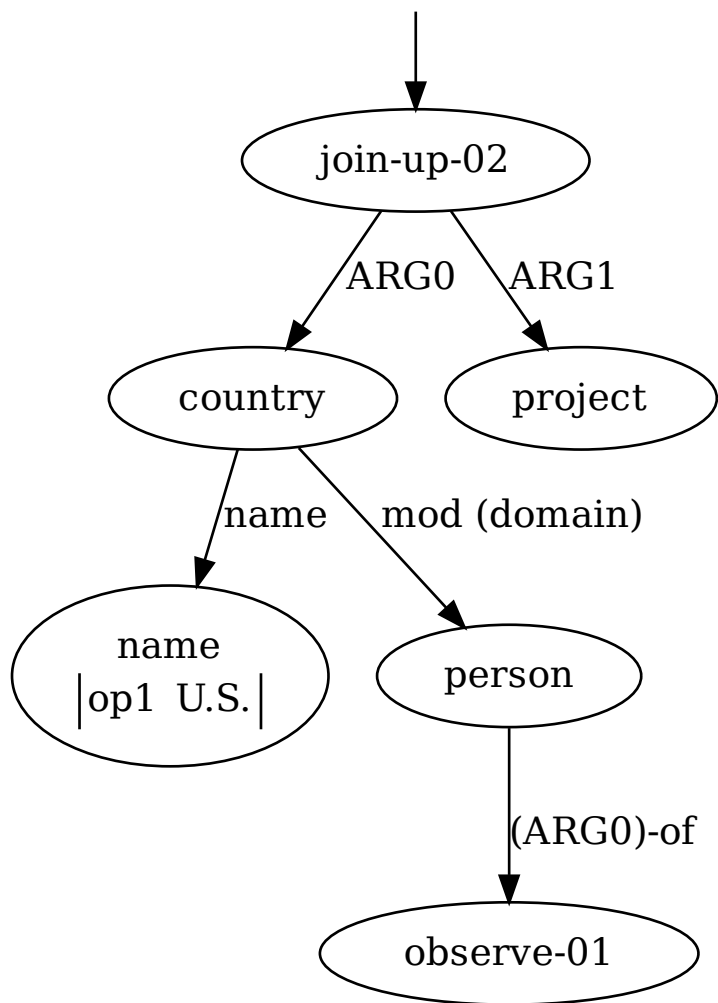

Supplement: software [file 2022.acl-short.51.software.zip]

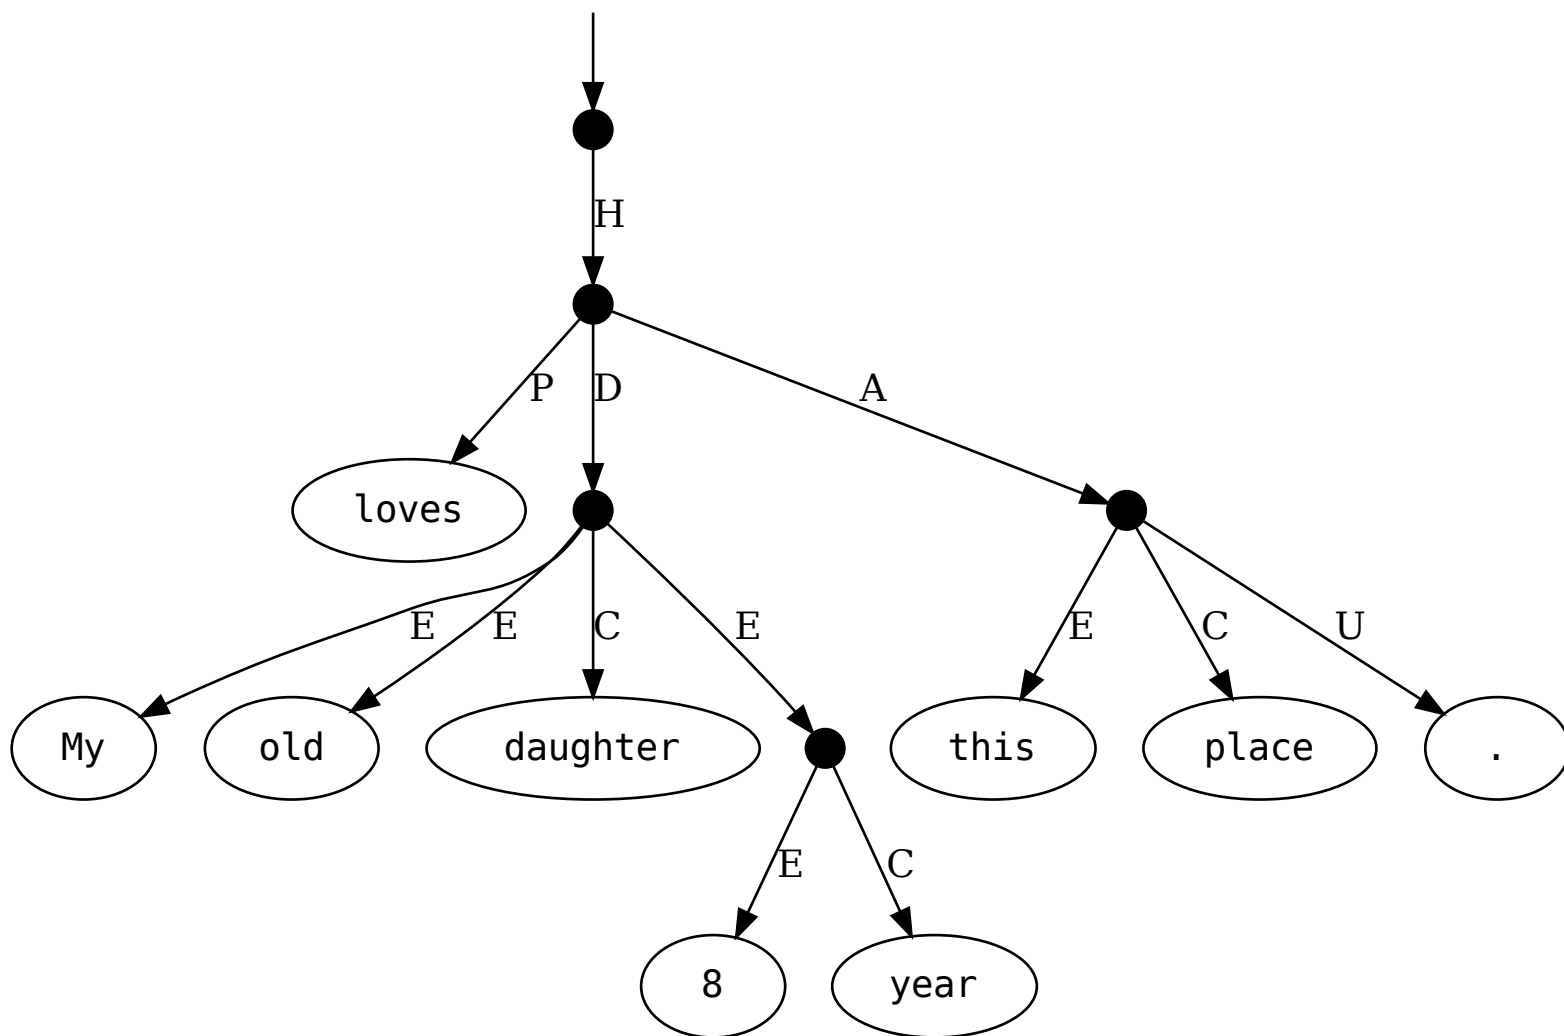

Supplement: software [file 2022.acl-short.51.software.zip]
